# Supplementary material for: Lamellar supramolecular materials based on a chelated metal complex for organic dye adsorption
Source: Royal Society of Chemistry journal article supplement (doi:10.1039/c6ra03381d), 2016-01-01
Supplement: c6ra03381d1.pdf [file c6ra03381d1.pdf]

## Supporting Information

### **Lamellar supramolecular materials based on chelated metal complex for organic dye adsorption**

*Yanan Zhang<sup>1</sup>, Yun Yan<sup>2</sup>, Jide Wang<sup>1\*</sup>, Jianbin Huang<sup>2\*</sup>*

<sup>1</sup>College of Chemistry and Chemical Engineering, Xinjiang University, Urumqi 830046, People's Republic of China

E-mail: awangjid@126.com

<sup>2</sup>Beijing National Laboratory for Molecular Sciences (BNLMS), State Key Laboratory for Structural Chemistry of Unstable and Stable Species, College of Chemistry and Molecular Engineering, Peking University, Beijing 100871, People's Republic of China

E-mail: yanyun@pku.edu.cn; jbh Huang@pku.edu.cn

## **The determination of the composition of the precipitates**

Elemental analysis was performed to analyze the composition, and the weight ratio of N: C: H was found to be 7.11: 55.94: 10.50, suggesting that the ratio of EDTA: DA was about 1:2. Meanwhile, XPS was also used to analyze the composition. It revealed that the atomic ratio of O: Cu is roughly 8:1, indicating that the molar ratio of EDTA: Cu is 1:1. Based on the above results, we infer that molar ratio of EDTA/Cu/DA is 1:1:2, namely, it is composed of the chelating complex of Cu-EDTA and DA at a molar ration of 1:2.
